# Supplementary material for: Contextual reprogramming of CAR-T cells for treatment of HER2+ cancers
Source: PubMed Central journal article supplement (PMC8573881; doi:10.1186/s12967-021-03132-6), 2021-11-07
Supplement: 12967_2021_3132_MOESM1_ESM.pdf [file 12967_2021_3132_MOESM1_ESM.pdf]

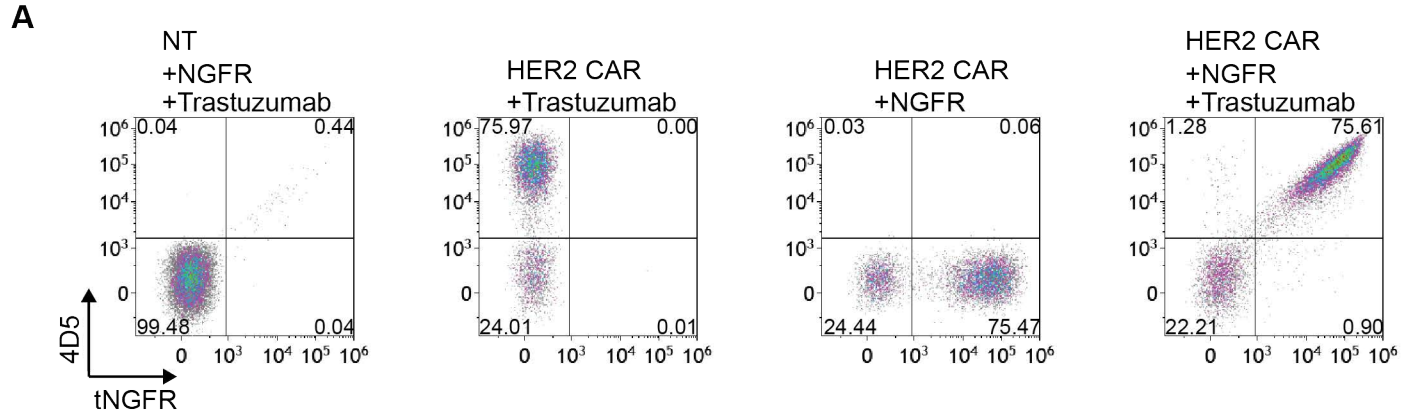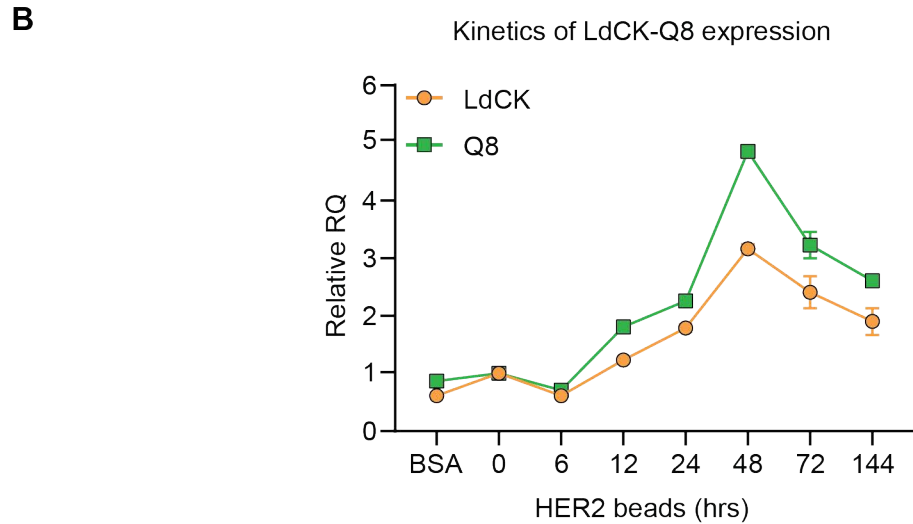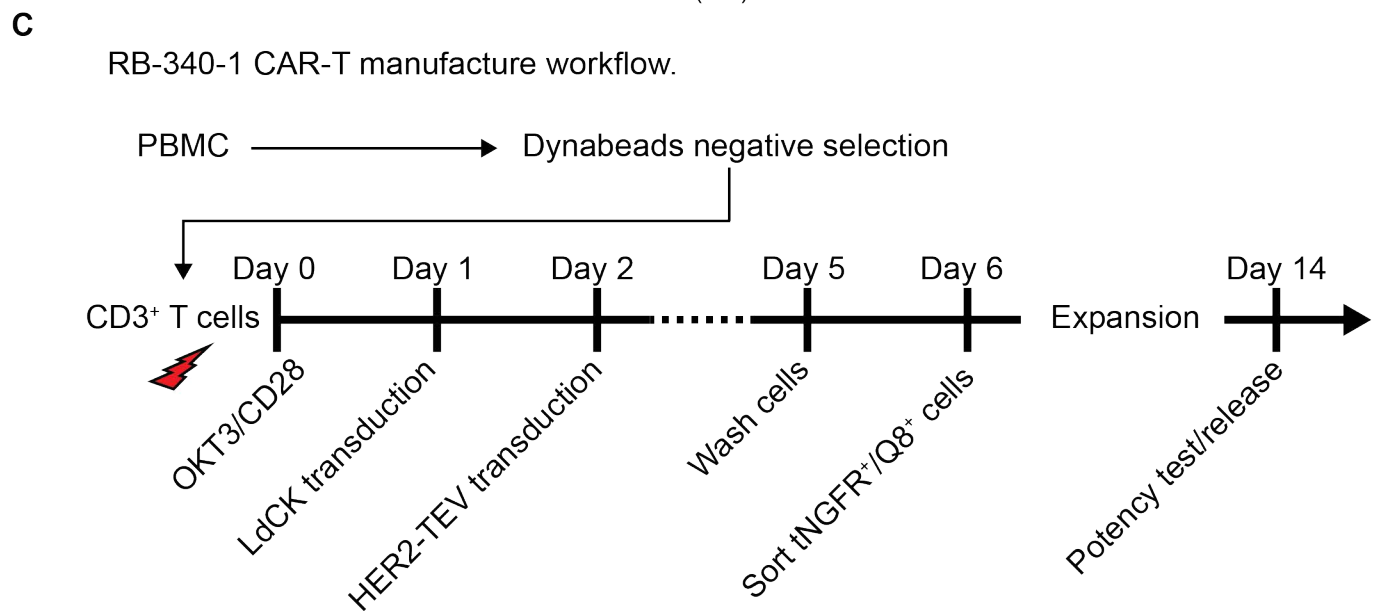

**Figure S1, related to Figure 1.**

**(A)** Comparative assessment of expression of HER2 CAR according to the anti-4D5 epitope idiotype antibody recognizing HER2 directly compared to the detection of the tNGFR tag. The latter is a preferred method for sorting and phenotyping of cells since it has no direct biological effect on T cell activation/function.

**(B)** Kinetics of expression of dCas9 and Q8 by qPCR. **(C) CAR-T manufacture process** – CD3<sup>+</sup> T cells are negatively selected from peripheral blood monocytes and stimulated with OKT3/CD28. LdCK is added for transduction a day later followed on the second day by HER2-TEV. Five days after the original stimulation the activation is removed and on the following day cells are sorted to enrich the tNGFR<sup>+</sup>/Q8<sup>+</sup> population. The expansion is then continued till time of release between day 14 of production. Cells are also tested at that point for permanence of transduction as shown in **Figure 1A**.
