# Supplementary material for: Contextual reprogramming of CAR-T cells for treatment of HER2+ cancers
Source: PubMed Central journal article supplement (PMC8573881; doi:10.1186/s12967-021-03132-6), 2021-11-07
Supplement: 12967_2021_3132_MOESM3_ESM.pdf [file 12967_2021_3132_MOESM3_ESM.pdf]

## A Intratumoral study design

Day 0:  
0.5 M FaDu-PDL1 s.c.

Day 9:  
Average tumor size:  $\sim 80 \text{ mm}^3$

Day 10:  
0.3 M CAR-T *i.t.*

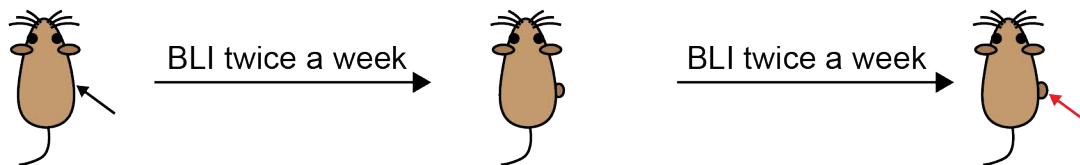

## B Experimental cohorts

|                                    |     |
|------------------------------------|-----|
| PBS                                | n=8 |
| NT (Non-transduced T cells, 0.3 M) | n=8 |
| HER2 CAR (0.3 M CAR-T cells)       | n=8 |
| cRB-340-1 (0.3 M CAR-T cells)      | n=8 |
| RB-340-1 (0.3 M CAR-T cells)       | n=8 |

**Figure S3, related to Figure 4A-B.**

**(A) Intratumoral administration model and study design.**

**(B) Experimental set up** – All treatment groups included eight mice receiving subcutaneous implantation of 0.5 million FaDu cells followed by adoptive transfer of CAR-T cells at day 10.
