# Supplementary material for: Contextual reprogramming of CAR-T cells for treatment of HER2+ cancers
Source: PubMed Central journal article supplement (PMC8573881; doi:10.1186/s12967-021-03132-6), 2021-11-07
Supplement: 12967_2021_3132_MOESM4_ESM.pdf [file 12967_2021_3132_MOESM4_ESM.pdf]

## A Intratumoral study design

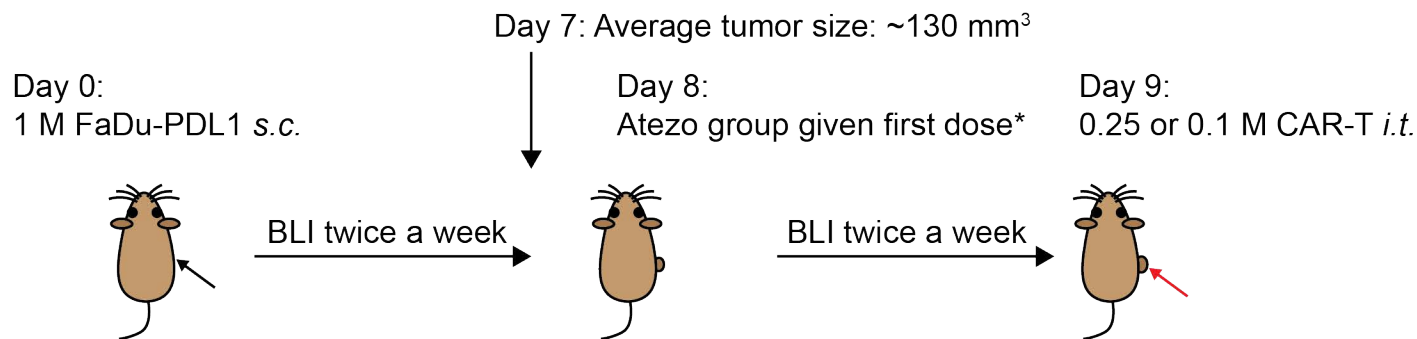

\*High dose of atezolizumab by *i.v.* injection:  
10 mg/kg at first dose and 5 mg/kg twice a week throughout the duration of the experiment

## B Experimental cohorts

|                                           |     |
|-------------------------------------------|-----|
| PBS                                       | n=6 |
| HER2 CAR (0.25 M CAR-T cells)             | n=5 |
| HER2 CAR (0.1 M CAR-T cells)              | n=5 |
| HER2 CAR plus Atezo (0.1 M CAR-T cells)   | n=5 |
| cRB-340-1 (0.25 M CAR-T cells)            | n=6 |
| cRB-340-1 plus Atezo (0.25 M CAR-T cells) | n=5 |
| cRB-340-1 (0.1 M CAR-T cells)             | n=6 |
| cRB-340-1 plus Atezo (0.1 M CAR-T cells)  | n=6 |
| RB-340-1 (0.25 M CAR-T cells)             | n=6 |
| RB-340-1 (0.1 M CAR-T cells)              | n=6 |

**Figure S4, related to Figure 4C-H.**

**(A) Intratumoral administration model and study design.**

**(B) Experimental set up** – All treatment groups included 5 or 6 mice receiving subcutaneous implantation of 1 million FaDu cells followed by adoptive transfer of CAR-T cells at day 9. Atezolizumab (10 mg/kg) was administered intravenously in the relevant groups the day before adoptive transfer (day 8) and subsequently dosed at 5 mg/kg twice a week.
